1           **Native language leaves distinctive traces in brain connections**

2           **Authors:** T. Goucha<sup>1,2†</sup>, A. Anwander<sup>1</sup>, H. Adamson<sup>1</sup> & A. D. Friederici<sup>1,2</sup>,

3   **Affiliations:**

4   <sup>1</sup>Max Planck Institute for Human Cognitive and Brain Sciences, Department of  
5   Neuropsychology, Leipzig, Germany. <sup>2</sup>Berlin School of Mind and Brain, Humboldt University,  
6   Berlin, Germany.

7   <sup>†</sup>Correspondence to: [goucha@cbs.mpg.de](mailto:goucha@cbs.mpg.de)

## 8 **Abstract**

9 The world's languages differ substantially in their sounds, grammatical rules, and expression  
10 of semantic relations. While starting from a shared neural substrate, the developing brain must  
11 therefore have the plasticity to accommodate to the specific processing needs of each  
12 language. However, there is little research on how language-specific differences impacts brain  
13 function and structure. Here, we show that speaking typologically different languages leaves  
14 unique traces in the brain's white matter connections of monolingual speakers of English (fixed  
15 word order language), German (with grammatical marking), and Chinese (tonal language).  
16 Using machine learning, we classified with high accuracy the mother tongue based on the  
17 participants' patterns of structural connectivity obtained with probabilistic tractography. More  
18 importantly, connectivity differences between groups could be traced back to relevant  
19 processing characteristics of each native tongue. Our results show that the life-long use of a  
20 certain language leaves distinct traces in a speaker's neural network.

## 21 **Introduction**

22 All humans share the neurobiological equipment that allows them to learn the language they  
23 are born into<sup>1,2</sup>. Considering the universality of the cognitive infrastructure underlying  
24 language<sup>2</sup>, one could easily deduce that all languages should be rather similar. Yet, this stands  
25 in stark contrast with the actual scope of variation that can be observed in the languages across  
26 the globe<sup>3</sup>. How the human cognitive system and its neurobiological basis are able to deal with  
27 this linguistic variety still is an open question. We will approach this question by first  
28 considering the language differences and their different processing demands and then explore  
29 to what extent these differences lead to modulations in the human neural system underlying  
30 language.

31 The languages of the world are grouped into families according to their genealogy, that is,  
32 which ancestors they have and how long ago they diverged. For example, Italian or French are  
33 classified as Romance languages because both evolved from Latin. Together with Germanic  
34 (e.g. German and English) and Slavic languages, they belong, in turn, to the higher-order family  
35 of the Indo-European languages. Yet, some of the closely related languages within each of these  
36 families are still typologically very diverse and underwent changes both with respect to their  
37 lexicon and grammar<sup>4,5</sup>.

38 The diversity across the languages of the world expresses itself in three main language  
39 domains: phonology, concerning its externalisation in sounds (for spoken languages) or signs  
40 (for sign languages), semantics, which deals with content, and syntax, regarding how words are  
41 structured into sentences. Starting with the sound systems that underlie each language, there  
42 are virtually no limits to their possible phonetic repertoires<sup>6</sup>. Among spoken languages, there  
43 is a fundamental distinction between those that only use vowels and consonants to

44 differentiate between words as in the Indo-European languages, and tonal languages, such as  
45 Chinese or Vietnamese, which also use different pitches or melodies on each syllable to  
46 distinguish words that otherwise would sound identical. Concerning semantics, the lexicon is  
47 organised according to general principles<sup>7</sup>, which remain considerably stable along language  
48 evolution<sup>4,5</sup>. Here, differences are more specific to particular topics<sup>8,9</sup>, especially as to how the  
49 words of a certain language reflect its particular sociocultural context<sup>10,11</sup>. Regarding syntax,  
50 human languages seem to follow a basic computational principle that combines words into  
51 hierarchical structures, building phrases and sentences<sup>2</sup>. However, the way this hierarchical  
52 structure is externalised into a sequence strongly depends on the specific language. A sentence  
53 usually describes who is doing what to whom, by saying what the subject (S) of the main verb  
54 (V) is doing to a person or object (O). Languages are classified typologically according to the  
55 preferred order in which these elements appear, the so-called canonical word order<sup>12</sup>, with a  
56 strong preference worldwide for either SVO (e.g., English and German) or SOV (e.g., Japanese).  
57 Additionally, languages use different cues to distinguish the subject from the object. English,  
58 for example, has a fixed SVO canonical word order, which clearly determines that the first noun  
59 phrase is the subject and the second the object. Other SOV languages like German, mark the  
60 subject and the object grammatically (e.g., by a particular word ending to convey case marking  
61 information), which allows sentence elements to move more freely in the sequence<sup>12</sup>. In sum,  
62 the diversity among languages and the way they convey information lead to the conclusion  
63 that the cognitive apparatus allowing us to acquire language is originally universal and open  
64 for each language, but then progressively adapts to the particular characteristics of the  
65 speaker's mother tongue along lifetime.  
66 In fact, psycholinguistic research focussing on language processing has shown that the

67 complex task of acquiring language starts in the mother's womb with learning the melody and  
68 rhythm of our native language<sup>13</sup>. The human new-born proceeds with fine-tuning to its  
69 particular sound repertoire<sup>14</sup>, which is achieved mostly within a year at the cost of a substantial  
70 loss of the ability to discriminate and learn new sounds from then on<sup>1</sup>. Subsequently, after  
71 having acquired their first words, children begin to combine words into bigger chunks, and  
72 eventually start building sentences. They have to recognise the different cues in their language  
73 in order to identify who did what to whom in a sentence<sup>15</sup>. Thus, adult speakers of different  
74 languages prioritise different information types (e.g. word order, case marking) during  
75 language comprehension<sup>16</sup>. Such cross-linguistic processing differences can be observed in the  
76 brain activity of speakers of different languages while listening to sentences with similar  
77 properties<sup>17</sup>. Brain imaging studies often stressing commonalities across languages<sup>18,19</sup>, also  
78 report cross-linguistic differences in brain activity<sup>20</sup>. In conclusion, not only do languages vary  
79 strongly in the way they are organised, speakers seem to adapt to such characteristics when  
80 processing their mother tongue.

81 If so, one would expect that such differences would be traceable in the human brain. The brain  
82 is known to generally adapt to its environment during development<sup>21</sup>, and connections in the  
83 brain can undergo extensive rewiring even in the adult brain<sup>22</sup>. This can be achieved by  
84 strengthening the connections in stronger use<sup>23</sup>, which makes the conduction of the neuronal  
85 signal more efficient, while losing those that become obsolete. Most studies investigating brain  
86 plasticity so far focus on the short-term effects of an experimental intervention involving a  
87 specific task<sup>24</sup>, a lifelong scale such as the use of a particular language processing strategies  
88 should reveal observable effects in the brain. This hypothesis is further motivated by the fact  
89 that the fibre pathways connecting the brain areas within the language network still undergo

90 strong maturation after birth well into adolescence<sup>25,26</sup>, and that their maturation stage is  
91 linked to language performance<sup>27</sup>. It is, thus, plausible that the trajectory of the growth of these  
92 white matter pathways is influenced by the use of one's native language.

93 To test this hypothesis we selected three typologically different languages that represent some  
94 of the strongest linguistic differences we have discussed above. Here, we selected English and  
95 German, two Indo-European languages of the Germanic branch that, despite being closely  
96 related, differ fundamentally in their syntactic structure. As a third and final language, we opted  
97 for Chinese, a Sino-Tibetan language which exhibits lexical tone, among other singularities  
98 introduced subsequently. In particular, we used diffusion MRI data to compare the brain  
99 structural connectivity of speakers of different mother tongues. We expected the differences in  
100 processing across languages to be structurally reflected in the white matter connections that  
101 support language processing.

102 Neurally, language is processed in a brain network mainly comprising brain regions around the  
103 Sylvian fissure in the left hemisphere, which are connected by fibre pathways that run either  
104 dorsally or ventrally to this anatomical landmark<sup>28-32</sup>, and can be partly found mirrored in the  
105 right hemisphere<sup>33</sup>. The posterior temporal cortex is a region where these white matter  
106 pathways overlap, being a point of convergence of dorsal and ventral processing streams<sup>28,34</sup>,  
107 frequently being implicated in integration of different types of information and sentence-level  
108 processing<sup>28,34,35</sup>. That is why we reconstructed the white matter connections that cross this  
109 region, hence obtaining a map of structural connectivity<sup>36</sup> of the language regions in each  
110 participant. Additionally, this also allowed us to analyse the transcallosal connections of the  
111 temporal cortex connecting the two hemispheres, which were shown to be crucial for the  
112 processing of intonation and the integration of prosody in sentence comprehension<sup>37,38</sup>. As a

113 novel approach in language studies, we used machine learning<sup>39</sup> to assess whether the overall  
114 pattern of connectivity of each participant contained information to infer their respective  
115 native language. After establishing that the connectivity maps allowed an accurate  
116 classification, we set out to identify the regions of the language network showing a significant  
117 modulation of their connectivity according to one's mother tongue. By comparing the  
118 connectivity maps of the three groups, we could assess whether the processing differences  
119 between the three languages corresponded to differences in structural connectivity.  
120 Concerning our hypothesis, we addressed the differences between each of the languages. We  
121 started to consider the differences between English and German. German – as already  
122 mentioned – is a language with free word order and is highly marked by grammatical cues<sup>40-42</sup>,  
123 which are used by speakers to retrieve the sentence structure<sup>15-17,43</sup>. These processes were  
124 shown to recruit the left inferior frontal gyrus (IFG)<sup>28,34,40</sup>, at the frontal end of the dorsal  
125 pathway<sup>27,28</sup>, which deals with the abstract sentence structure that is inferred from grammatical  
126 rules<sup>44</sup>. English sentences mostly have a reliable, fixed word order<sup>15,41</sup>, and speakers of English  
127 are more influenced by semantic cues, such as animacy<sup>16</sup>, or meaning associations between  
128 sentence elements, which are mainly processed in the ventral stream<sup>29,30</sup>. For this reason, we  
129 expected stronger dorsal connectivity to the inferior frontal cortex in the German-speaking  
130 group, whereas the English-speaking should in turn display stronger connectivity in the ventral  
131 stream. Concerning Chinese, we first focus on the differences between tonal and non-tonal  
132 languages. To date a number of studies have shown a more bilateral involvement while  
133 processing lexical tone in both spoken<sup>45</sup> and written<sup>46</sup> language, in comparison to atonal  
134 languages<sup>20,47</sup>, which was also shown to be reflected in brain morphology<sup>48</sup>. Although the lexico-  
135 semantic processing of lexical tone is mainly left-lateralised, the processing of pitch

136 information is in general less lateralised than the processing of the acoustic features that  
137 distinguish other speech sounds as consonants and vowels<sup>49</sup>. Additionally, the pitch  
138 information from lexical tone must be integrated with sentence prosody, known to be  
139 processed in the right hemisphere<sup>33</sup>. Altogether, this would require a stronger cross-talk  
140 between both hemispheres in Chinese speakers. That is why we expected stronger connectivity  
141 in the right hemisphere and in the fibres of the corpus callosum in this language group. Besides,  
142 Chinese is known for its exceptionally large number of homophones<sup>20</sup>, even when taking lexical  
143 tone into account. These three languages also differ in other aspects, for example in their  
144 writing systems and orthography depth, which will be discussed in more detail later<sup>19</sup>. In sum,  
145 we hypothesised that the specific processing demands from each of these three typologically  
146 different languages would lead to differences in the strength of the white matter fibre pathways  
147 of their speakers. Here, we show that this is indeed the case by using a multivariate pattern  
148 recognition analysis on the structural connectivity of two independent samples of speakers for  
149 each of the three languages, followed by a mass univariate analysis to localise those  
150 differences.



151 **Results**

152 **Mapping connectivity of language regions with fibre tractography followed by**  
153 **classification with machine learning.** Using probabilistic tractography<sup>36</sup> with seeds in the  
154 posterior superior and middle temporal gyri (pSTG, and pMTG respectively), we mapped the  
155 structural connectivity in a total of 134 monolingual native speakers of Chinese, English, and  
156 German, with two independent subsamples for each language, matched for sex, age, and  
157 education (Chinese: N = 30 + 18; English: 20 + 18; German: 30 + 18). First, we were able to  
158 consistently map a universal network of white matter pathways connecting the brain regions  
159 typically involved in language processing, which was common to all subjects in both  
160 subsamples of each language (Supplementary Figure S1). The brain images of all subjects were  
161 registered to a balanced sample-specific template to minimise potential effects of any  
162 population differences in global brain morphology. First, we did not find significant differences  
163 in brain volume across groups. Additionally, to prevent further analyses from yielding results in  
164 regions with systematic differences in brain shape between groups, we excluded all areas  
165 requiring strong deformation during normalisation to our template (Supplementary Figure S2).  
166 We then applied machine learning to classify the connectivity maps we obtained for each  
167 language data set. We trained a Gaussian process classifier in a k-fold cross-validation scheme  
168 on the whole dataset, which was able to predict the language corresponding to the brain  
169 structure in the test data-set with high accuracy. The classifier performed significantly above  
170 chance ( $p < 0.001$ , assessed by a permutation test with 10,000 permutations) with classification  
171 accuracies ranging from 68.64% to 76.46%. Figure 1 graphically displays the performance of  
172 the Gaussian process classifier in the left hemisphere (Supplementary Figure S3 corresponds  
173 to the analogous analysis performed in the right hemisphere). Additionally, to assess whether

174 this result was generalizable between independent datasets with different scanning  
175 conditions, we conducted a prediction analysis by training the classifier in the first and bigger  
176 subsample of matched participants (N = 80) to predict the language of the second subsample  
177 on the basis of their connectivity (N = 54). The classifier still performed significantly above-  
178 chance accuracy for three of the seed ROIs (left pSTG, right STG, and right MTG), with accuracies  
179 ranging 55.12-61.11% ( $p < 0.01$ , assessed with permutation test). We finally ran the classifier  
180 only within the datasets acquired in the same scanner at the same site (48 German speakers,  
181 and 18 Chinese speakers), to exclude a scanner-specific effect, and its performance remained  
182 above chance ( $p < 0.01$ , assessed with permutation test, taking into account uneven sample  
183 sizes).

184

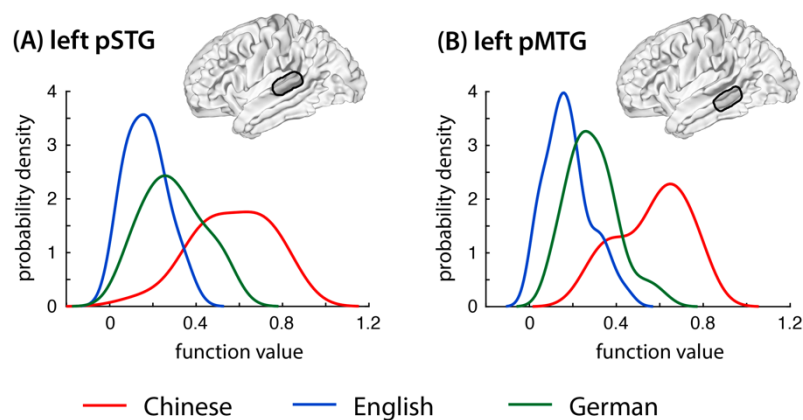

185

186 **Figure 1.** Performance of the classifier. Performance of the classifier on the connectivity map  
187 of the two temporal seed ROIs in the left hemisphere, (A) the left posterior superior temporal  
188 gyrus (pSTG) and (B) the left posterior middle temporal gyrus (pMTG). Performance for the  
189 three different languages is colour coded red for Chinese, blue for English and green for  
190 German.

191

192 **Localisation of connectivity differences using voxel-wise analysis.** After showing that the  
193 connectivity maps contained information to decode the mother tongue of a subject accurately,  
194 we proceeded to localise the regions with significant differences in structural connectivity  
195 across the three groups, using a conventional mass univariate approach. More concretely, we  
196 performed spatial voxel-wise statistical comparisons of the connectivity maps of the speakers  
197 of each language. As one would expect from the previous results, the white matter network,  
198 while fundamentally shared between all participants, showed locally specific modulations by  
199 each of the three languages. Once again, areas requiring strong deformation in the registration  
200 to the template space were excluded.

201 **Connectivity differences from seed ROIs in the left hemisphere: Conjunction analysis.** To  
202 summarise the main findings concerning regional differences in brain connectivity across the  
203 three languages, we first present the result of a conjunction analysis for the sake of  
204 conciseness. Figure 2 therefore shows brain areas where one language group displayed  
205 significantly higher connectivity values than either of the other two languages across the two  
206 subsamples (see Supplementary Figure S4 for slice views). However, the results from the direct  
207 pair-wise comparison of the connectivity maps of each of the three pairs of languages are  
208 largely superposable (and are thus exhaustively presented in the next section). In particular,  
209 German speakers exhibited a cluster with stronger connectivity between the pSTG with the IFG  
210 via the dorsally located arcuate fascicle. English speakers, in turn, showed a stronger  
211 connectivity of the pMTG with a cluster in the anterior temporal cortex via the ventrally located  
212 inferior and middle longitudinal fascicles and extreme capsule fibre system. Finally, Chinese  
213 speakers displayed stronger connectivity of the left pSTG to the right hemisphere, with clusters  
214 spanning through the corpus callosum to the contralateral temporal cortex and another cluster

215 reaching into the subcortical grey matter, especially at the thalamus. Furthermore, the left  
216 pMTG in this group similarly presented stronger connectivity to cortical and subcortical regions  
217 in the right hemisphere via the corpus callosum. Additionally, we found connections in the left  
218 hemisphere to the contiguous *planum temporale* extending to the parietal cortex and  
219 ipsilateral subcortical grey matter regions. In sum, the group comparison of the connectivity  
220 maps across the three languages demonstrated significant differences along the white matter  
221 pathways of different processing streams (Figure 2, Supplementary Figure S5, Supplementary  
222 Figure S6).

223

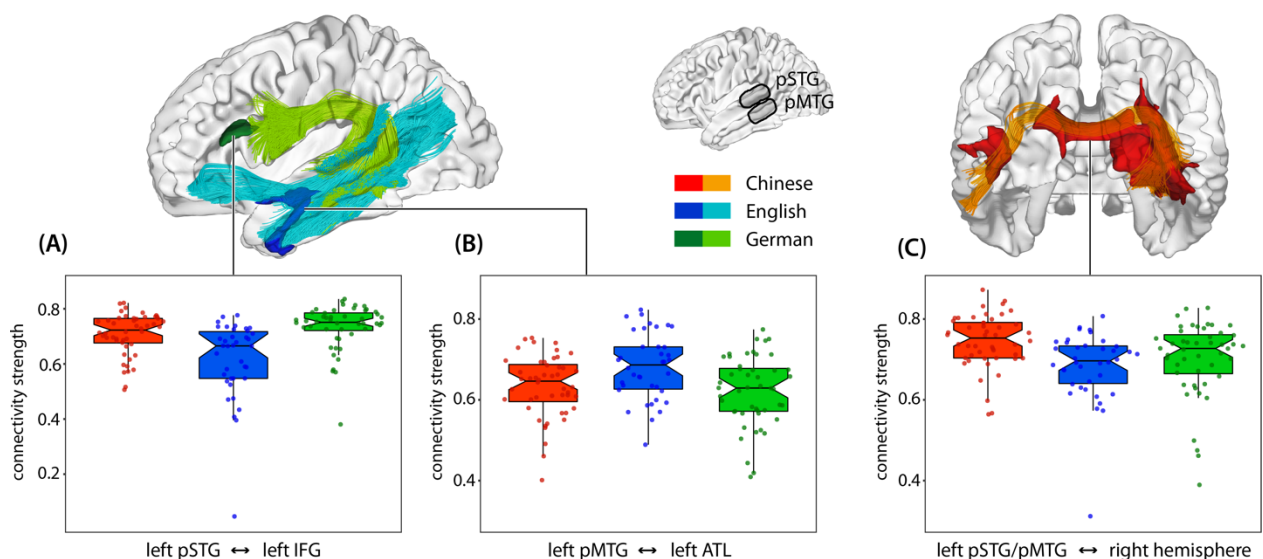

225

225 **Figure 2.** Cross-linguistic differences in white matter connectivity. White matter connectivity  
226 from left Wernicke's area (posterior superior/middle temporal gyrus, pSTG, pMTG) to (A) the  
227 left inferior frontal gyrus (IFG), and (B) the left anterior temporal lobe (ATL) and to (C) the right  
228 hemisphere. Conjunction analysis on the seed regions in the left hemisphere. The connectivity  
229 strength for the three languages is colour coded in red for Chinese, blue for English and green  
230 for German. The box-plot shows median, quartiles, 1.5x interquartile range and all individual  
231 data points.

232 **Connectivity differences from seed ROIs in the left hemisphere: Pair-wise comparison. A**

233 more detailed pair-wise direct comparison between each two languages corroborated the  
234 previous results (Figure 3). First, the comparison between English and German speakers yielded  
235 higher ventral connectivity from the pMTG to the anterior temporal lobe in the English group,  
236 as opposed to higher dorsal connectivity along the arcuate fascicle from both the pSTG and the  
237 pMTG to the inferior frontal gyrus in the German group. Furthermore, the pSTG seed in the  
238 German group displayed higher bilateral subcortical connectivity and transcallosal  
239 connectivity in premotor regions. Second, when comparing Chinese and English speakers, the  
240 former showed stronger inter-hemispheric connectivity with the contralateral temporal lobe,  
241 at the corpus callosum in the frontal and temporal regions from both the pSTG and pMTG.  
242 Additionally, both the pSTG and pMTG seeds displayed higher connectivity along the dorsal  
243 stream to the IFG. The English group showed, in turn, no significant clusters with stronger  
244 connectivity. Finally, when comparing Chinese and German speakers, Chinese speakers  
245 exhibited a stronger connectivity between both the pSTG and the pMTG and the cortical and  
246 subcortical contralateral regions. Additionally, the pMTG in Chinese speakers showed stronger  
247 connectivity to a cluster in the left pSTG. In turn, the German group showed no significant  
248 clusters with stronger connectivity from the left pSTG or pMTG. In the right hemisphere, we  
249 mainly found stronger transcallosal connectivity to the left hemisphere in the Chinese group,  
250 in line with our findings for this language in the left hemisphere (see Supplementary Figure S7  
251 and Supplementary Figure S8 for more detail).

252

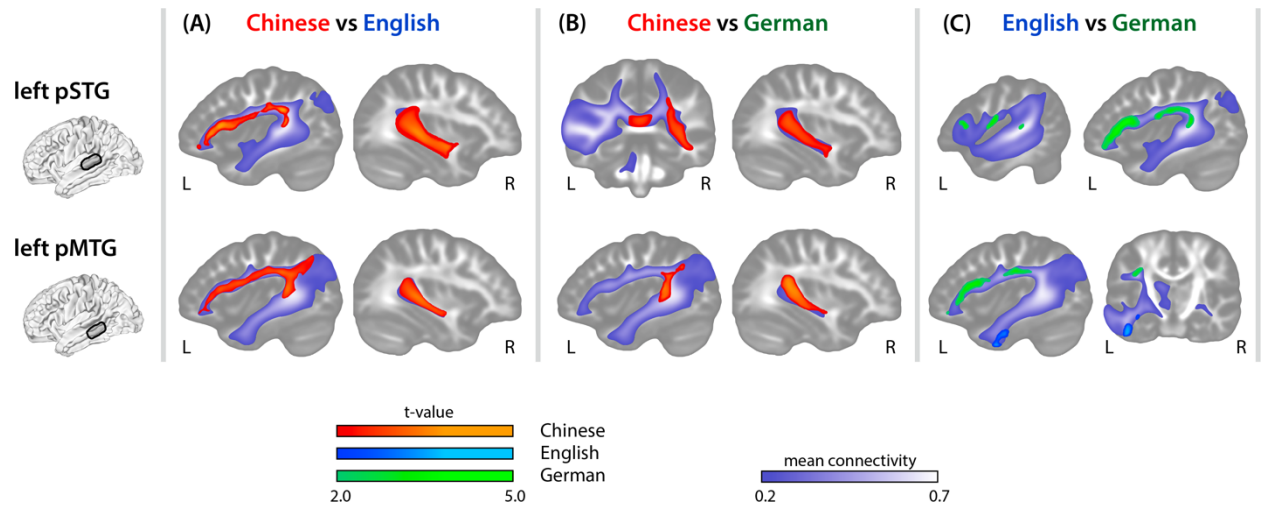

## 257 **Discussion**

258 Our study provides evidence that the life-long use of a particular language leaves a distinct  
259 footprint in the brain's structural connectivity. We showed that the individual connectivity  
260 pattern was sufficient to accurately classify the specific mother tongue of each participant in  
261 our sample. We found that although the major white matter fibre pathways comprising the  
262 language network are present in all participants, the strength of the connections along the  
263 different neural pathways is modulated according to the specific characteristics of the  
264 speaker's mother tongue. Specifically, the results indicate that different processing demands  
265 of a given language leave particular traces in the white matter language network. Cross-  
266 linguistic differences have been reported earlier in behavioural studies<sup>3,9,50</sup> and  
267 electrophysiological studies<sup>17</sup> for phonological and lexical processing, and moreover, for how  
268 grammatical rules of a language relate to the way a language conveys information<sup>17,51,52</sup>. Even  
269 though there are universal principles guiding language acquisition<sup>53-56</sup>, the languages of the  
270 world provide their users with different cues to retrieve the underlying structure of a given  
271 sentence<sup>15,17</sup>. Here, we demonstrated that three languages which have different cues and  
272 correspondingly imply different processing demands lead to differences in the brains'  
273 structural connectivity within the language network.

274 The connectivity differences we found at the brain level are congruent with the specific  
275 processing demands proposed for each language investigated in this study. First, we  
276 demonstrated a clear contrast between the dorsal and ventral pathways between English and  
277 German speakers. Although both languages belong to the Indo-European family, English has  
278 fairly scarce grammatical marking, while German uses grammatical markers to convey the  
279 relations between sentence elements<sup>41</sup>. Accordingly, German speakers resort to the

280 grammatical cues during sentence processing<sup>15,17</sup>, implying higher demands in application of  
281 syntactic rules concerning sentence structure. Here we showed that such demands give rise to  
282 a stronger recruitment of the arcuate fascicle in the dorsal pathway – a white matter fibre  
283 pathway that has been correlated with processing complex sentence structures<sup>27,44</sup>. English  
284 speakers, in contrast, resort less to the infrequent cues concerning grammatical marking<sup>15,44</sup>,  
285 comparatively depending more on semantic information to infer the content of an utterance.  
286 We showed that at the neural level, English speakers more strongly engage the ventral pathway  
287 – a pathway which has been associated with language comprehension and in particular  
288 semantic processing<sup>30,57,58</sup>. The comparison between German and English speakers shows that  
289 two languages that belong to the same language family, but differ in their processing demands,  
290 influence the white matter brain structure differentially.  
291 Chinese, in contrast to English and German, is a tonal language belonging to the Sino-Tibetan  
292 family. This implies that Chinese requires steady tracking of pitch information, partly processed  
293 in the right hemisphere, and phonological and lexical information processed in the left  
294 hemisphere. The stronger white matter connection between the two hemispheres via the  
295 posterior part of the corpus callosum we found in Chinese speakers compared to German  
296 speakers is taken to reflect the stronger bilateral involvement shown for processing tonal  
297 languages<sup>19,47</sup> and the transcallosal connectivity which is the basis for the integration of pitch  
298 information with other linguistic information<sup>37,38</sup>.  
299 German, English and Chinese also differ from each other in their writing systems. Whereas  
300 Chinese is logographic both English and German are alphabetic languages with German having  
301 a very shallow orthography with an almost direct correspondence between graphemes and  
302 phonemes, while English has a rather deep orthography with a more opaque correspondence



303 between how a word is written and its pronunciation. These two types of processing of  
304 alphabetic writing have respectively been associated with either a stronger engagement of the  
305 dorsal or ventral pathway<sup>19</sup>. In the case of Chinese there is no clear evidence as to which brain  
306 regions are preferentially recruited in reading<sup>19,46</sup>.

307 A final consideration about the cross-linguistic differences in this study regards word order and  
308 length of the dependencies established between elements in a sentence, for example, the  
309 dependency between the verb and its object. Some languages (such as German and  
310 Chinese<sup>59,60</sup>) have on average a much higher dependency length than other languages (such as  
311 English and most Romance languages<sup>59</sup>). The processing of long distance dependencies,  
312 necessary in Chinese and German, should recruit the dorsal stream given their role in sentence  
313 structure building<sup>28</sup> and its connection to the inferior frontal gyrus, recruited in time-dependent  
314 reordering of sentence elements<sup>31,61</sup>. This hypothesis is once again in agreement with our  
315 findings concerning connectivity differences across languages and especially the stronger  
316 dorsal connectivity of German and Chinese speakers in direct comparison to English speakers.  
317 In conclusion, our results point to a link between the specific processing demands of each  
318 language and the observed differences in brain structure.

319 Several precautions were taken to prevent unwanted misinterpretations due to possible  
320 confounds. First, we obtained two independent samples of speakers for each of the three  
321 languages to improve generalisability of the results and ensure the differences were not  
322 sample-specific. In fact, we could train the classifier with a first subsample for each language  
323 to then accurately predict the corresponding language on the basis of the connectivity in the  
324 other subsample. Second, in each of the two subsamples the participants in the three groups  
325 were matched for socio-demographic variables, in particular age, sex, and educational

326 background. Third, to avoid that our results could be attributed to systematic differences in  
327 brain geometry, we excluded areas with strong differences in brain shape between groups from  
328 the voxel-wise analysis. Finally, the brain regions used as seeds for tractography as well as the  
329 regions exhibiting significant group differences we found here occur in white matter fibre  
330 pathways with a major role in language processing<sup>27,30,62</sup> and their differences can be explained  
331 by the specific processing demands of the languages under investigation.

332 Moreover, the present results show no anatomical overlap with imaging studies assessing  
333 social and cultural differences between Western and Eastern populations. The effects in these  
334 studies consistently involved another set of brain regions, frequently including the medial  
335 prefrontal cortex<sup>63</sup>, but not areas belonging to the language network. In sum, the enumerated  
336 arguments strongly indicate that the present white matter differences are indeed due to the  
337 life-long use of the respective language. Recent genetic and neurobiological data support the  
338 view that the differences in brain structure we observed result from experience rather than  
339 from strong biological predisposition<sup>64</sup>. If our results were a mere consequence of innate  
340 genetic differences, we would expect that geographical proximity<sup>65</sup> should strongly determine  
341 the extent of the differences in brain structure, with the connectivity of German speakers and  
342 English speakers being very similar, and Chinese speakers with much stronger differences.  
343 However, the degree of dissimilarity in white matter connectivity in several regions between  
344 the Chinese group and both the English and the German group was comparable to the  
345 difference between the two European groups. This suggests that other mechanisms play a  
346 major role here.

347 Our data rather suggest that brain plasticity occurs due to the differential recruitment of parts  
348 of the brain network, putatively as an instance of activity-dependent white matter plasticity<sup>23,66</sup>.

349 In fact, the white matter pathways that compose the language network are already present,  
350 but not fully developed at birth<sup>67</sup>, which allows them to be shaped as a function of  
351 environmental requirements. This view is additionally supported by a functional brain study<sup>47</sup>.  
352 The present results illustrate how plasticity in white matter<sup>21</sup> allows the brain to adapt to its  
353 environment, even with respect to a higher cognitive function shared by all humans. The innate  
354 neural system with universal principles<sup>1,55,56,68</sup> adapts progressively to its input<sup>13,68</sup> and is  
355 ultimately shaped by it. A common genetic endowment providing the neurobiological  
356 foundations of cognition, eventually gives rise to different structures in accordance to  
357 environmental exposure. Here, we provide evidence that the systematic yet subtle life-long  
358 processing differences required by a cognitive function, namely language processing, can give  
359 rise to structural brain differences. In conclusion, the outstanding human capacity to  
360 proficiently learn the complex system of symbols and rules that constitutes a human language  
361 seems to not only lie in a neurobiological predetermined faculty, but also requires the ability  
362 of our brain to adapt to the specific demands of each language in human development.

363

364 **Author Contributions:**

365 T.G., A.A., and A.D.F. designed the research; T.G., H.A. and A.A. analysed the data; and T.G., A.A.,  
366 and A.D.F. wrote the paper.

367 **Data and materials availability:** All data needed to evaluate the conclusions in the paper are  
368 present in the paper and/or the Supplementary Information.

369 **References**

- 370 1. Kuhl, P. K. Early language acquisition: cracking the speech code. *Nat. Rev. Neurosci.* **5**, 831-843  
371 (2004).
- 372 2. Friederici, A. D., Chomsky, N., Berwick, R. C., Moro, A., & Bolhuis, J. J. Language, mind and brain. *Nat.*  
373 *Hum. Behav.* **1**, 713-722 (2017).
- 374 3. Evans, N., & Levinson, S. C. The myth of language universals: Language diversity and its importance  
375 for cognitive science. *Behav. Brain Sci.* **32**, 429-448 (2009).
- 376 4. Greenhill, S. J., Atkinson, Q. D., Meade, A., & Gray, R. D. The shape and tempo of language  
377 evolution. *Proc. R. Soc. B: Biol. Sci.* **277**, 2443-2450 (2010).
- 378 5. Greenhill, S. J., Wu, C. H., Hua, X., Dunn, M., Levinson, S. C., & Gray, R. D. Evolutionary dynamics of  
379 language systems. *Proc. Natl. Acad. Sci. USA* **114**, E8822-E8829 (2017).
- 380 6. Pierrehumbert, J. What people know about sounds of language. *Ling. Sci.* **29**, 111-1201 (1999).
- 381 7. Youn, H., Sutton, L., Smith, E., Moore, C., Wilkins, J. F., Maddieson, I., ... & Bhattacharya, T. On the  
382 universal structure of human lexical semantics. *Proc. Natl. Acad. Sci.* **113**, 1766-1771 (2016).
- 383 8. Enfield, N. J. Linguistic Relativity from Reference to Agency. *Ann. Rev. Anthropol.* **4**, 207-224 (2015).
- 384 9. Regier, T. & Kay, P. Language, thought, and color: Whorf was half right. *Trends Cogn. Sci.* **13**, 439-  
385 446 (2009).
- 386 10. Lupyan, G. & Dale, R. Why Are There Different Languages? The Role of Adaptation in Linguistic  
387 Diversity. *Trends Cogn. Sci.* **20**, 649-660 (2016).
- 388 11. Thompson, B., Roberts, S. G., & Lupyan, G. Cultural influences on word meanings revealed through  
389 large-scale semantic alignment. *Nat. Hum. Behav.* 1-10 (2020).
- 390 12. Gibson, E., Futrell, R., Piandadosi, S. T., Dautriche, I., Mahowald, K., Bergen, L., & Levy, R. How  
391 efficiency shapes human language. *Trends Cogn. Sci.* (2019).
- 392 13. Friederici, A. D., Friedrich, M., & Christophe, A. Brain responses in 4-month-old infants are already  
393 language specific. *Curr. Biol.* **17**, 1208-1211 (2007).
- 394 14. Cheour, M., et al. Development of language-specific phoneme representations in the infant brain.  
395 *Nat. Neurosci.* **1**, 351-353 (1998).
- 396 15. MacWhinney, B., Bates, E., & Kliegl, R. Cue validity and sentence interpretation in English, German,  
397 and Italian. *J. Verb. Learn. Verb. Beh.* **23**, 127-150 (1984).
- 398 16. Gennari, S. P., Mirković, J., & MacDonald, M. C. Animacy and competition in relative clause  
399 production: A cross-linguistic investigation. *Cogn. Psychol.* **65**, 141-176 (2012).
- 400 17. Bornkessel-Schlesewsky, I., et al. Think globally: cross-linguistic variation in electrophysiological  
401 activity during sentence comprehension. *Brain Lang.* **117**, 133-152 (2011).

- 402 18. Honey, C. J., Thompson, C. R., Lerner, Y., & Hasson, U. Not lost in translation: neural responses  
403 shared across languages. *J. Neurosci.* **32**, 15277-15283 (2012).
- 404 19. Rueckl, J. G., et al. Universal brain signature of proficient reading: Evidence from four contrasting  
405 languages. *Proc. Natl. Acad. Sci. USA* **112**, 15510-15515 (2015).
- 406 20. Ge, J., et al. Cross-language differences in the brain network subserving intelligible speech. *Proc.*  
407 *Natl. Acad. Sci. USA* **112**, 2972-2977 (2015).
- 408 21. Zatorre, R. J., Fields, R. D., & Johansen-Berg, H. Plasticity in gray and white: neuroimaging changes  
409 in brain structure during learning. *Nat. Neurosci.* **15**, 528-536 (2012).
- 410 22. Johansen-Berg, H. Structural plasticity: rewiring the brain. *Curr. Biol.* **17**, R141-R144 (2007).
- 411 23. Wake, H., Lee, P. R., & Fields, R. D. Control of local protein synthesis and initial events in myelination  
412 by action potentials. *Science* **333**, 1647-1651 (2011).
- 413 24. Maguire, E. A., Gadian, D. G., Johnsrude, I. S., Good, C. D., Ashburner, J., Frackowiak, R. S., & Frith,  
414 C. D. Navigation-related structural change in the hippocampi of taxi drivers. *Proc. Natl. Acad. Sci.*  
415 *USA* **97**, 4398-4403 (2000).
- 416 25. Sowell, E. R., et al. Mapping cortical change across the human life span. *Nat. Neurosci.* **6**, 309-315  
417 (2003).
- 418 26. Pujol, J., et al. Myelination of language-related areas in the developing brain. *Neurology* **66**, 339-34.  
419 (2006).
- 420 27. Skeide, M., Brauer, J., & Friederici, A. D. Brain functional and structural predictors of language  
421 performance. *Cereb. Cortex* **26**, 2127-2139 (2016).
- 422 28. Friederici, A. D. The brain basis of language processing: from structure to function. *Physiol. Rev.* **91**,  
423 1357-1392 (2011).
- 424 29. Hickok, G., & Poeppel, D. The cortical organization of speech processing. *Nat. Rev. Neurosci.* **8**, 393-  
425 402 (2007).
- 426 30. Saur, D., et al. Ventral and dorsal pathways for language. *Proc. Natl. Acad. Sci. USA* **105**, 18035-18040  
427 (2008).
- 428 31. Bornkessel-Schlesewsky, I., Schlewsky, M., Small, S. L., & Rauschecker, J. P. Neurobiological  
429 roots of language in primate audition: common computational properties. *Trends Cogn. Sci.* **19**,  
430 142-150 (2015).
- 431 32. Catani, M., Jones, D. K., Ffytche, D. H. Perisylvian language networks of the human brain. *Ann.*  
432 *Neurol.* **57**, 8-16 (2005).
- 433 33. Sammler, D., Grosbras, M. H., Anwender, A., Bestelmeyer, P. E., & Belin, P. Dorsal and ventral  
434 pathways for prosody. *Curr. Biol.* **25**, 3079-3085 (2015).

- 435 34. Hagoort, P., & Indefrey, P. The neurobiology of language beyond single words. *Ann. Rev. Neurosci.*  
436 **37**, 347-362 (2014).
- 437 35. Mesulam, M. M., Thompson, C. K., Weintraub, S., & Rogalski, E. J. The Wernicke conundrum and the  
438 anatomy of language comprehension in primary progressive aphasia. *Brain* **138**, 2423-2437 (2015).
- 439 36. Behrens, T. E. J., et al. Probabilistic diffusion tractography with multiple fibre orientations: what  
440 can we gain? *NeuroImage* **34**, 144-155 (2007).
- 441 37. Friederici, A. D., von Cramon, D. Y., Kotz, S. A. Role of the corpus callosum in speech comprehension:  
442 interfacing syntax and prosody. *Neuron* **53**, 135-145 (2007).
- 443 38. Sammler, D., et al. Prosody meets syntax: the role of the corpus callosum. *Brain* **133**, 2643-2655  
444 (2010).
- 445 39. Vu, M. A. T., et al. A shared vision for machine learning in neuroscience. *J. Neurosci.* **38**, 1601-1607  
446 (2018).
- 447 40. Goucha, T., & Friederici, A. D. The language skeleton after dissecting meaning: A functional  
448 segregation within Broca's Area. *NeuroImage* **114**, 294-302 (2015).
- 449 41. Haider, H. *The syntax of German*. Cambridge University Press. (2010).
- 450 42. Wartenburger, I., et al. Early setting of grammatical processing in the bilingual brain. *Neuron* **37**,  
451 159-170 (2003).
- 452 43. Slobin, D. I., & Bever, T. G. Children use canonical sentence schemas: A crosslinguistic study of word  
453 order and inflections. *Cognition* **12**, 229-265 (1982).
- 454 44. Fedzechkina, M., Newport, E. L., & Jaeger, T. F. Balancing effort and information transmission  
455 during language acquisition: Evidence from word order and case marking. *Cogn. Sci.* **41**, 416-446  
456 (2016).
- 457 45. Kwok, V. P., Dan, G., Yakpo, K., Matthews, S., Fox, P. T., Li, P., & Tan, L. H. A meta-analytic study of  
458 the neural systems for auditory processing of lexical tones. *Front. Hum. Neurosci.* **11**, 375 (2017).
- 459 46. Kwok, V. P., Matthews, S., Yakpo, K., & Tan, L. H. Neural correlates and functional connectivity of  
460 lexical tone processing in reading. *Brain Lang.* **196**, 104662 (2019).
- 461 47. Pierce, L. J., et al. Mapping the unconscious maintenance of a lost first language. *Proc. Natl. Acad.*  
462 *Sci. USA* **111**, 17314-17319 (2014).
- 463 48. Crinion, J. T., Green, D. W., Chung, R., Ali, N., Grogan, A., Price, G. R., ... & Price, C. J. Neuroanatomical  
464 markers of speaking Chinese. *Hum. Brain Mapp.* **30**, 4108-4115 (2009).
- 465 49. Flinker, A., Doyle, W. K., Mehta, A. D., Devinsky, O., & Poeppel, D. Spectrotemporal modulation  
466 provides a unifying framework for auditory cortical asymmetries. *Nat. Hum. Behav.* **3**, 393 (2019).
- 467 50. Winawer J, et al. Russian blues reveal effects of language on color discrimination. *Proc. Natl. Acad.*

- 468        *Sci. USA* **104**, 7780-7785 (2007).
- 469    51. Carreiras, M., et al. Subject relative clauses are not universally easier to process: Evidence from  
470        Basque. *Cognition* **115**, 79-92 (2010).
- 471    52. Athanasopoulos, P., et al. Two Languages, Two Minds Flexible Cognitive Processing Driven by  
472        Language of Operation. *Psychol. Sci.* **26**, 518-526 (2015).
- 473    53. Berwick, R. C., Friederici, A. D., Chomsky, N., & Bolhuis, J. Evolution, brain, and the nature of  
474        language. *Trends Cogn. Sci.* **17**, 89-98 (2013).
- 475    54. Christiansen, M. H., & Chater, N. Language as shaped by the brain. *Behav. Brain Sci.* **31**, 489-509  
476        (2008).
- 477    55. Friederici, A. D., & Singer, W. Grounding language processing on basic neurophysiological  
478        principles. *Trends Cogn. Sci.* **19**, 329-338 (2015).
- 479    56. Newport, E. L. Statistical language learning: Computational, maturational, and linguistic  
480        constraints. *Lang. Cogn.* **8**, 447-461 (2016).
- 481    57. Rolheiser, T., Stamatakis, E. A., & Tyler, L. K. Dynamic processing in the human language system:  
482        synergy between the arcuate fascicle and extreme capsule. *J. Neurosci.* **31**, 16949-16957 (2011).
- 483    58. Almairac, F., et al. The left inferior fronto-occipital fasciculus subserves language semantics: a  
484        multilevel lesion study. *Brain Struct. Funct.* **220**, 1983-1995 (2014).
- 485    59. Liu, H. Dependency distance as a metric of language comprehension difficulty. *J. Cogn. Sci.* **9**, 159-  
486        191 (2008).
- 487    60. Futrell, R., Mahowald, K., & Gibson, E. Large-scale evidence of dependency length minimization in  
488        37 languages. *Proc. Natl. Acad. Sci. USA* **112**, 10336-10341 (2015).
- 489    61. Meyer, L., Obleser, J., Anwander, A., & Friederici, A. D. Linking ordering in Broca's area to storage in  
490        left temporo-parietal regions: the case of sentence processing. *NeuroImage* **62**, 1987-1998 (2012).
- 491    62. Wilson, S. M., et al. Syntactic processing depends on dorsal language tracts. *Neuron* **72**, 397-403  
492        (2011).
- 493    63. Chiao, J. Y., et al. Neural basis of individualistic and collectivistic views of self. *Hum. Brain Mapp.* **30**,  
494        2813-2820 (2009).
- 495    64. Thompson, B., Kirby, S., & Smith, K. Culture shapes the evolution of cognition. *Proc. Natl. Acad. Sci.*  
496        **113**, 4530-4535 (2016).
- 497    65. Cavalli-Sforza, L. L., & Feldman, M. W. The application of molecular genetic approaches to the study  
498        of human evolution. *Nat. Genet.* **33**, 266-275 (2003).
- 499    66. McKenzie, I. A., et al. Motor skill learning requires active central myelination. *Science* **346**, 318-322  
500        (2014).

- 501 67. Perani, D., et al. Neural language networks at birth. *Proc. Natl. Acad. Sci. USA* **108**, 16056-16061  
502 (2011)
- 503 68. Ding, N., et al. Cortical tracking of hierarchical linguistic structures in connected speech. *Nat.*  
504 *Neurosci.* **19**, 158-164 (2016).



## 505 **Methods**

506 **Participants.** Three groups of young German, English, and Chinese speaking students were  
507 scanned in a Siemens 3T TimTrio magnetic resonance imaging (MRI) device (Siemens  
508 Healthineers, Erlangen, Germany). From these groups, we selected datasets that meet strict  
509 quality criteria of no measurement artifacts or neurological anomalies. We further matched the  
510 demographic variables gender (71 female, 63 male), age (24.8 +/- 3 years), handedness<sup>1</sup>, and  
511 level of education between groups, resulting in a total of 134 monolingual native speakers  
512 participants of each of the three languages.

513 The data was acquired in two different samples covering all three languages in each study. The  
514 first sample included 30 German, 20 English and 30 Chinese datasets scanned on MRI machines  
515 of the same model in Leipzig (Germany), Cambridge (UK) and Beijing (China), with a well-  
516 matched scanning protocol<sup>2,3</sup>. The second sample included 18 German, 18 British and 18  
517 Chinese datasets. The German and Chinese datasets were scanned on the same MRI device in  
518 Leipzig (Germany), and the English speaking participants were scanned on an MRI machine of  
519 the same model in Glasgow (UK) with the same protocol as the German group. The detailed  
520 scanning parameters are described in the following section. Written informed consent was  
521 obtained from all participants, and data acquisition was approved by the respective local  
522 ethics committees, the Institutional Review Board of Beijing Normal University Imaging Center  
523 for Brain Research, the ethics committee of the College of Science and Engineering at the  
524 University of Glasgow, the Cambridge Psychology Research Ethics Committee, and the Ethics  
525 Committee of the University of Leipzig.

526 **Imaging data acquisition, preprocessing, and generation of group-specific template.** All  
527 participants obtained a T1-weighted structural image with 1 mm isotropic resolution using a

528 3D MPRAGE sequence with whole-brain coverage. In the first sample, in the English and German  
529 groups, diffusion MRI images were acquired using 64 diffusion directions and a b-value of 1000  
530  $\text{s/mm}^2$  and one non-diffusion-weighted image<sup>2</sup> (parameters: repetition time, TR = 6.5 s, echo  
531 time, TE = 93 ms, GRAPPA acceleration factor 2, 12-channel acquisition head coil, 48 axial slices,  
532 2.5 mm thickness, in-plane resolution =  $1.8 \times 1.8 \text{ mm}^2$ ). The diffusion MRI datasets of the Chinese  
533 participants were acquired with a very similar protocol using 64 diffusion directions with  
534  $b = 1000 \text{ s/mm}^2$  and one non-diffusion-weighted image<sup>3</sup> (parameters: TR = 7.2 s, TE = 104 ms, 49  
535 axial slices, 2.5 mm thickness, in-plane resolution =  $2.0 \times 2.0 \text{ mm}^2$ ). In the second sample, for all  
536 three groups diffusion MRI images were acquired using 60 diffusion directions with a b-value  
537 of  $1000 \text{ s/mm}^2$  and seven non-diffusion-weighted images with an isotropic voxel size of 1.7 mm  
538 and a 32-channel acquisition head coil.

539 Preprocessing was done in a consistent way for the datasets of all three groups in both samples.  
540 The brain was segmented from the T1 weighted image and aligned with the AC-PC coordinate  
541 system<sup>4</sup>. The diffusion images were denoised<sup>5</sup>, corrected for motion and registered<sup>6</sup> to the  
542 structural image using the FSL software (University of Oxford, UK). The diffusion tensor and the  
543 fractional anisotropy (FA) images were computed in the native diffusion resolution. Finally, the  
544 distribution of up to two crossing fibre directions per voxel were computed using FSL for  
545 probabilistic crossing fibre tractography<sup>7</sup>.

546 Additionally, a high-resolution FA image was created at 1 mm isotropic resolution for each  
547 participant, and a balanced sample-specific template was generated from those images using  
548 the ANTs software<sup>8</sup> using a random selection of 60 participants (20 from each language group).  
549 This template was used for the definition of regions of interest (ROIs) for tractography and for  
550 the normalisation of the tractography results of each participant. This avoided having a bias

551 towards the specific brain structure of any of the three groups. The two datasets from each  
552 sample were combined for each language group to perform statistical analysis across groups  
553 to increase the robustness and reproducibility of the results.

554 **Definition of regions of interest (ROIs).** ROIs for tractography were defined based on  
555 anatomical landmarks on the common template. We defined two ROIs, in the pSTG, and in the  
556 pMTG, corresponding to a definition of Wernicke's area based on anatomical connectivity<sup>9</sup> and  
557 functional relevance for sentence-level processing<sup>10,11</sup>. Taking into account the lack of  
558 agreement in the definition of this area<sup>12,13</sup>, we opted for a straightforward anatomical  
559 definition of our seed ROIs (described in detail in the Supplementary Methods).

560 **Probabilistic tractography, generation of connectivity maps in common space.** Using  
561 diffusion MRI probabilistic tractography, we conducted seed-to-brain tractography from each  
562 seed ROI without exclusion or waypoint masks. For each seed ROI in each participant, we  
563 obtained a map of the connectivity between each brain voxel and the respective seed region,  
564 corresponding to the whole-brain connectivity fingerprint of that seed ROI. In particular,  
565 crossing fibre probabilistic tractography<sup>7</sup> was computed by starting 10,000 streamlines in each  
566 voxel of the seed ROI. This algorithm creates a map for the entire brain that represents the  
567 number of streamlines that cross each voxel representing the connectivity of this voxel to the  
568 seed region. These maps were then logarithmised to obtain a normal distribution of  
569 connectivity values, and normalised by the logarithm of the total number of streamlines  
570 started in the respective seed ROI, so that we obtained maps with connectivity values ranging  
571 between 0 and 1. These maps were spatially registered to the template space with a nearest  
572 neighbour interpolation, and smoothed with a Gaussian kernel of 4 mm (FWHM) using the  
573 software SPM 12 (University College London, UK). In this way, the voxel values related to the

574 structural connectivity of that particular voxel with the corresponding seed region and will  
575 henceforth be called connectivity, and the corresponding maps labelled connectivity maps.  
576 Supplementary Figure 1 displays the average connectivity maps across all participants and in  
577 each of the language groups.

578 **Statistical analysis – Machine learning with a Gaussian process classifier.** First, we trained  
579 a Gaussian process classifier on the complete dataset (N = 134) of the connectivity maps for  
580 each of the four seed ROIs (left and right pSTG and pMTG) as implemented in the PRoNTo  
581 toolbox, as this was the more adequate procedure for a three-class classification<sup>14</sup>. The cross-  
582 validation scheme was implemented by a balanced 10-fold cross-validation from which the  
583 average balanced prediction accuracies were obtained. The classifier was run within white  
584 matter areas ( $FA \geq 0.2$ ) with systematic connections across groups (mean connectivity  $\geq 0.2$ ) for  
585 each of the seed regions. The double mask was used in all brain analyses to ensure statistics  
586 would be computed in white matter regions with connectivity values that are sufficiently  
587 sampled by the probabilistic tractography method and therefore might show relevant effect  
588 sizes. To prevent the results from being a mere product of group-specific systematic distortions  
589 related to macroanatomical differences in brain shape, we computed the mean deformation at  
590 each brain voxel from the normalisation field, and excluded in brain areas with strong  
591 deformations (Supplementary Figure S3). The performance of the classifier is measured by the  
592 average balanced accuracy of the test sets. To obtain the statistical significance of the  
593 classification accuracy above chance, a permutation test was run for each of the classifications,  
594 with 10,000 permutations<sup>14</sup>. The histograms in Figure 1 (for the left hemispheric ROIs) and  
595 Supplementary Figure S2 (for the right hemispheric ROIs) show the probability distribution of  
596 the function values of the Gaussian classifier per class, that is language group. Finally, to assess

597 the replicability in independent datasets, we trained the classifier on the connectivity maps  
598 pertaining to the larger data set (N = 80) and tested it in the smaller sample (N = 54). To exclude  
599 that this effect was due to the use of different scanners, we also ran the classifier in the three  
600 subsamples acquired at the same site (German N = 48, Chinese N = 18; taking the unbalanced  
601 sample size into account). Again, to verify the statistical significance of the classification  
602 accuracy, a permutation test was run for each of the classifications, with 10,000 permutations.

603 **Statistical analysis – Mass univariate voxel-wise statistics.** We then performed spatial voxel-  
604 wise statistical comparisons of the normalised connectivity maps of the speakers of each  
605 language to identify areas with significant differences in structural connectivity across groups<sup>15</sup>  
606 using SPM 12. This enabled us to identify areas where the connectivity strength was higher in  
607 one language group than in the others. Once again, we only considered voxels within the  
608 previously defined mask (mean FA  $\geq 0.2$  and mean connectivity  $\geq 0.2$ ). We computed t-tests and  
609 report results at  $p < 0.001$  peak-level,  $p < 0.05$  cluster-level family-wise error (FWE) corrected.  
610 We both computed direct bidirectional pair-wise comparisons between two languages (Figure  
611 3), and conjunction analysis (Figure 2 and S4). The direct comparisons were performed as a  
612 one-sided t-test in the typical implementation of SPM. Besides, we performed a conjunction  
613 analysis between the comparisons between each language and the other two. Such an analysis  
614 provides us with the particularities of brain structure associated with each language group  
615 compared with the other two.

616 **Tractography from seed ROIs to significant clusters in conjunction analysis.** Statistical  
617 differences in a specific region obtained in probabilistic tractography do not necessarily reflect  
618 local effects. That is why it is fundamental to integrate them in the fibre pathways that connect  
619 the seed regions and the significant clusters. In particular, they might result from the overall

620 differences along those fibre pathways. We used probabilistic tractography to establish the  
621 course of these pathways crossing both the seed ROI and the region where significant  
622 differences had been found. The results of this analysis serve two purposes. On the one hand,  
623 the connectivity maps outline the fibre tracts passing by both the posterior temporal cortex  
624 and the regions showing stronger connectivity modulation in function of one's mother tongue.  
625 Thus, Supplementary Figure 5 assists us in diagnosing which fibre pathways are involved to a  
626 higher degree in a given language.

627 Furthermore, to assess the magnitude of the connectivity differences across groups in the areas  
628 with significant differences, we computed the connectivity strength in a seed to target  
629 tractography from the seed ROIs to the respective significant areas. The connectivity values  
630 were normalised in the same way as for the creation of the connectivity maps (i.e.,  
631 logarithmised and divided by the logarithm of the total of streamlines started in the seed  
632 region). The plots in the lower row of Figure 2 display the probability distribution of  
633 connectivity strength in each of three groups from the seed regions to one of three target areas  
634 with significant connectivity differences between groups (left IFG, left ATL, and conjoined  
635 significant clusters in the right hemisphere). The white lines in the plots correspond to the  
636 percentiles 75, 50, and 25. In these plots, we can see that the magnitude of the differences  
637 between the European groups and the Chinese group is comparable with the difference  
638 between the two European groups in the significant regions. The Cohens's d effect sizes of the  
639 group differences are shown in a detailed estimation graphic<sup>16</sup> (see Supplementary Results and  
640 Supplementary Figure S9).

641 **Visualisation of the group averaged tractography.** To illustrate the group averaged  
642 tractography and relate the areas of significant connectivity differences with the fibre

643 pathways of the language system, we performed an additional group average deterministic  
644 tractography as previously used<sup>17,18</sup> (for details see Supplementary Methods). These  
645 representative tractograms were used in Figure 2 and Supplementary Figure 6 to help visualise  
646 the fibre tracts where connectivity differences were found.

647 **References Methods**

- 648 1. Oldfield RC (1971) The assessment and analysis of handedness: the Edinburgh inventory.  
649 *Neuropsychologia* 9:97-113.
- 650 2. Griffiths JD, Marslen-Wilson WD, Stamatakis EA, Tyler LK (2013) Functional organization of the  
651 neural language system: dorsal and ventral pathways are critical for syntax. *Cereb Cortex* 23:139-  
652 147.
- 653 3. Yan C, et al. (2011) Sex-and brain size-related small-world structural cortical networks in young  
654 adults: a DTI tractography study. *Cereb Cortex* 21:449-58.
- 655 4. Lohmann GK, et al. (2001) Lpsia—a new software system for the evaluation of functional magnetic  
656 resonance images of the human brain. *Comput Med Imag Graph* 25:449-457.
- 657 5. Lohmann GK, et al. (2010) Image restoration and spatial resolution in 7-Tesla magnetic resonance  
658 imaging. *Magn Reson Med* 64: 15-22.
- 659 6. Jenkinson M, Bannister P, Brady M, Smith S (2002) Improved optimization for the robust and  
660 accurate linear registration and motion correction of brain images. *NeuroImage* 17:825-41.
- 661 7. Behrens TEJ, et al. (2007) Probabilistic diffusion tractography with multiple fibre orientations: what  
662 can we gain? *NeuroImage* 34:144-155.
- 663 8. Avants BB, et al. (2011) A reproducible evaluation of ANTs similarity metric performance in brain  
664 image registration. *NeuroImage* 54:2033-2044.
- 665 9. Catani M, Jones DK, Ffytche DH (2005) Perisylvian language networks of the human brain. *Ann*  
666 *Neurol* 57:8-16.
- 667 10. Friederici AD (2011) The brain basis of language processing: from structure to function. *Physiol Rev*  
668 91:1357-1392.
- 669 11. Hagoort, P., & Indefrey, P. (2014). The neurobiology of language beyond single words. *Ann Rev*  
670 *Neurosci* 37:347-362.
- 671 12. Mesulam MM, Thompson CK, Weintraub S, Rogalski EJ (2015) The Wernicke conundrum and the  
672 anatomy of language comprehension in primary progressive aphasia. *Brain* 138:2423-2437.
- 673 13. Tremblay P, Dick A S (2016) Broca and Wernicke are dead, or moving past the classic model of  
674 language neurobiology. *Brain Lang* 162:60-71.
- 675 14. Schrouff J, et al. (2013) PRoNTTo: pattern recognition for neuroimaging toolbox. *Neuroinformatics*  
676 11:319-337.
- 677 15. Argyelan M, et al. (2009) Cerebellothalamocortical connectivity regulates penetrance in dystonia. *J*  
678 *Neurosci* 29:9740-9747.
- 679 16. Ho J, et al. (2019). Moving beyond P values: data analysis with estimation graphics. *Nature Meth*,



- 680            16:565-566.
- 681    17. Perani D, et al. (2011) Neural language networks at birth. *Proc Natl Acad Sci USA* 108:16056-16061.
- 682    18. Lazar M, et al. (2003) White matter tractography using diffusion tensor deflection. *Hum Brain Mapp*
- 683            18:306-321.
